# Supplementary material for: Interaction of Ca2+ with uracil and its thio derivatives in the gas phase
Source: Royal Society of Chemistry journal article supplement (doi:10.1039/b810418b), 2008-01-01
Supplement: b810418b.pdf [file b810418b.pdf]

## **Interaction of Ca<sup>2+</sup> with Uracil and its Thio Derivatives in the Gas Phase**

Cristina Trujillo<sup>a</sup>, Al Mokhtar Lamsabhi<sup>a</sup>, Otilia M<sup>ó</sup><sup>a</sup>, Manuel Yáñez<sup>a</sup> and Jean-Yves Salpin<sup>b</sup>

*Contribution from Departamento de Química, C-9, Universidad Autónoma de Madrid. Cantoblanco, 28049-Madrid (Spain) and Université d'Evry Val d'Essonne – Laboratoire d'Analyse et Modélisation pour la Biologie et l'Environnement (LAMBE).CNRS – UMR 8587 – Bâtiment Maupertuis, Boulevard François Mitterrand, 91025 Evry, France*

**Supplementary Data (a total of 13 pages)**

**Table S1.** B3LYP/6-311+G(3df,2p) Calculated Total Energies and B3LYP/6-31G(d,p) Zero-Point Vibrational Energies (ZPVE). All values are in hartrees

|           | Energy      |              |              |                  | ZPVE    |              |              |                  |
|-----------|-------------|--------------|--------------|------------------|---------|--------------|--------------|------------------|
|           | Uracil      | 2-thiouracil | 4-thiouracil | 2,4-Dithiouracil | Uracil  | 2-thiouracil | 4-thiouracil | 2,4-Dithiouracil |
| <b>1</b>  | -1092,03403 | -1414,97189  | -1414,99144  | -1737,92951      | 0,08653 | 0,08398      | 0,08425      | 0,08167          |
| <b>2a</b> | -1092,06063 | -1415,01176  | -1415,02393  | -1737,97572      | 0,08701 | 0,08425      | 0,08151      | 0,07882          |
| <b>2b</b> | -1092,06966 | -1415,02485  | -1415,02925  | -1737,98283      | 0,08734 | 0,08477      | 0,08174      | 0,07910          |
| <b>3a</b> | -1092,05746 | -1415,01230  | -1415,02608  | -1737,98094      | 0,08664 | 0,08414      | 0,08157      | 0,07900          |
| <b>3b</b> | -1092,06407 | -1415,01856  | -1415,02753  | -1737,98219      | 0,08703 | 0,08447      | 0,08168      | 0,07909          |
| <b>4</b>  | -1092,05027 | -1415,00429  | -1414,98645  | -1737,94119      | 0,08711 | 0,08466      | 0,08438      | 0,08197          |
| <b>5a</b> | -1092,05763 | -1415,01737  | -1415,00950  | -1737,96974      | 0,08673 | 0,08104      | 0,08403      | 0,07985          |
| <b>5b</b> | -1092,06006 | -1415,02128  | -1415,01555  | -1737,97549      | 0,08673 | 0,08127      | 0,08415      | 0,07843          |
| <b>6a</b> | -1092,02317 | -1414,99573  | -1414,97926  | -1737,93183      | 0,08590 | 0,08099      | 0,08404      | 0,07817          |
| <b>6b</b> | -1092,02317 | -1414,99119  | -1414,96441  | -1737,93554      | 0,08671 | 0,08088      | 0,08334      | 0,07821          |
| <b>7</b>  | -           | -            | -            | -1737,93692      | -       | -            | -            | 0,08283          |
| TS1_4     | -1091,99804 | -1414,96324  | -1414,96800  | -                | 0,08534 | 0,08326      | 0,08334      | -                |
| TS1_2a    | -1091,98006 | -1414,91882  | -1414,95265  | -1737,89120      | 0,08179 | 0,07910      | 0,07838      | 0,07713          |
| TS2a_2b   | -1092,05108 | -1415,00573  | -1415,01256  | -1737,96977      | 0,08552 | 0,08301      | 0,08073      | 0,07979          |
| TS4_5a    | -1091,98617 | -1414,95761  | -1414,92208  | -1737,89364      | 0,08206 | 0,07855      | 0,07926      | 0,07733          |
| TS5a_5b   | -1092,05051 | -1415,01334  | -1415,00546  | -                | 0,08552 | 0,08075      | 0,08470      | -                |
| TS1_7     | -           | -            | -            | -1737,92210      | -       | -            | -            | 0,08288          |
| TS7_4     | -           | -            | -            | -1737,92868      | -       | -            | -            | 0,08302          |

**Table S2.** B3LYP/6-31G(d,p) optimized Geometries (Cartesian Coordinates in Å) of the Stationary Points of the potential energy surfaces connecting the different structures of uracil-Ca<sup>2+</sup>, and thiouracils-Ca<sup>2+</sup> complexes

| Uracil |           |           |          |    |           |           |          |  |
|--------|-----------|-----------|----------|----|-----------|-----------|----------|--|
| 1      |           |           | 2a       |    |           |           |          |  |
| 1      | -2.170108 | 1.305661  | 0.000000 | 1  | -2.292673 | -1.108097 | 0.000000 |  |
| 2      | -0.768698 | 1.362295  | 0.000000 | 2  | -1.045352 | -1.671145 | 0.000000 |  |
| 3      | -2.824697 | 0.129615  | 0.000000 | 3  | -2.420962 | 0.248966  | 0.000000 |  |
| 4      | -2.664708 | 2.269541  | 0.000000 | 4  | -3.134548 | -1.791970 | 0.000000 |  |
| 5      | 0.000000  | 0.256443  | 0.000000 | 5  | 0.086377  | -0.914674 | 0.000000 |  |
| 6      | -2.084923 | -1.126521 | 0.000000 | 6  | -1.227558 | 1.017927  | 0.000000 |  |
| 7      | -0.310514 | 2.264947  | 0.000000 | 7  | -0.925598 | -2.682384 | 0.000000 |  |
| 8      | -3.906756 | 0.081826  | 0.000000 | 8  | -3.385635 | 0.740491  | 0.000000 |  |
| 9      | -0.634257 | -0.920410 | 0.000000 | 9  | 0.000000  | 0.454249  | 0.000000 |  |
| 10     | 1.290400  | 0.341001  | 0.000000 | 10 | 1.232906  | -2.374351 | 0.000000 |  |
| 11     | -2.498615 | -2.255205 | 0.000000 | 11 | -1.374095 | 2.322698  | 0.000000 |  |
| 12     | -0.093936 | -1.780630 | 0.000000 | 12 | -0.544047 | 2.825282  | 0.000000 |  |
| 13     | 3.447034  | 0.299678  | 0.000000 | 13 | 2.578285  | 0.351821  | 0.000000 |  |

**2b**

|    |           |           |          |
|----|-----------|-----------|----------|
| 1  | -2.214743 | -1.231800 | 0.000000 |
| 2  | -0.955822 | -1.758515 | 0.000000 |
| 3  | -2.397012 | 0.124604  | 0.000000 |
| 4  | -3.036538 | -1.940222 | 0.000000 |
| 5  | 0.152516  | -0.957513 | 0.000000 |
| 6  | -1.231755 | 0.935136  | 0.000000 |
| 7  | -0.807915 | -2.766275 | 0.000000 |
| 8  | -3.393279 | 0.550615  | 0.000000 |
| 9  | 0.000000  | 0.398857  | 0.000000 |
| 10 | 1.324723  | -1.430811 | 0.000000 |
| 11 | -1.239635 | 2.252302  | 0.000000 |
| 12 | 2.476252  | 0.561832  | 0.000000 |
| 13 | -2.131290 | 2.642358  | 0.000000 |

**3a**

|    |           |           |          |
|----|-----------|-----------|----------|
| 1  | 0.006519  | -1.741914 | 0.000000 |
| 2  | -0.691322 | -0.576666 | 0.000000 |
| 3  | 1.385834  | -1.803293 | 0.000000 |
| 4  | -0.579581 | -2.656007 | 0.000000 |
| 5  | 0.000000  | 0.590698  | 0.000000 |
| 6  | 2.092878  | -0.594092 | 0.000000 |
| 7  | 1.928348  | -2.740386 | 0.000000 |
| 8  | 1.381089  | 0.573244  | 0.000000 |
| 9  | -0.624383 | 1.691701  | 0.000000 |
| 10 | 3.398252  | -0.603008 | 0.000000 |
| 11 | 1.838088  | 1.484901  | 0.000000 |
| 12 | -2.748606 | 0.813025  | 0.000000 |
| 13 | 3.854553  | 0.257002  | 0.000000 |

**3b**

|    |           |           |          |
|----|-----------|-----------|----------|
| 1  | 0.023378  | -1.742261 | 0.000000 |
| 2  | -0.683950 | -0.588878 | 0.000000 |
| 3  | 1.408374  | -1.794512 | 0.000000 |
| 4  | -0.552287 | -2.663374 | 0.000000 |
| 5  | 0.000000  | 0.590832  | 0.000000 |
| 6  | 2.095881  | -0.575847 | 0.000000 |
| 7  | 1.937839  | -2.739633 | 0.000000 |
| 8  | 1.371934  | 0.580136  | 0.000000 |
| 9  | -0.642133 | 1.680385  | 0.000000 |
| 10 | 3.387432  | -0.374853 | 0.000000 |
| 11 | 3.924122  | -1.187451 | 0.000000 |
| 12 | 1.862404  | 1.475953  | 0.000000 |
| 13 | -2.755808 | 0.793109  | 0.000000 |

**4**

|    |           |           |          |
|----|-----------|-----------|----------|
| 1  | -2.265620 | 1.030117  | 0.000000 |
| 2  | -2.713482 | -0.242040 | 0.000000 |
| 3  | -0.921031 | 1.325394  | 0.000000 |
| 4  | -3.024176 | 1.806485  | 0.000000 |
| 5  | -1.875435 | -1.366549 | 0.000000 |
| 6  | 0.000000  | 0.253340  | 0.000000 |
| 7  | -3.709950 | -0.448784 | 0.000000 |
| 8  | -0.577717 | 2.350046  | 0.000000 |
| 9  | -0.504540 | -1.008808 | 0.000000 |
| 10 | -2.253085 | -2.505714 | 0.000000 |
| 11 | 1.287368  | 0.396988  | 0.000000 |
| 12 | 0.124619  | -1.806758 | 0.000000 |
| 13 | 3.390582  | 0.813547  | 0.000000 |

**5a**

|    |           |           |          |
|----|-----------|-----------|----------|
| 1  | -2.158394 | -1.337449 | 0.000000 |
| 2  | -2.309430 | 0.040568  | 0.000000 |
| 3  | -0.919943 | -1.890485 | 0.000000 |
| 4  | -3.079213 | -1.910058 | 0.000000 |
| 5  | -1.230472 | 0.857922  | 0.000000 |
| 6  | 0.208122  | -1.004258 | 0.000000 |
| 7  | -3.250579 | 0.424893  | 0.000000 |
| 8  | -0.768610 | -2.962912 | 0.000000 |
| 9  | 0.000000  | 0.373460  | 0.000000 |
| 10 | -1.345572 | 2.170731  | 0.000000 |
| 11 | 1.419539  | -1.372377 | 0.000000 |
| 12 | 2.476418  | 0.644182  | 0.000000 |
| 13 | -2.755808 | 0.793109  | 0.000000 |

**5b**

|    |           |           |          |
|----|-----------|-----------|----------|
| 1  | -2.249097 | -1.198559 | 0.000000 |
| 2  | -2.332604 | 0.173643  | 0.000000 |
| 3  | -1.029879 | -1.798985 | 0.000000 |
| 4  | -3.191727 | -1.734648 | 0.000000 |
| 5  | -1.224011 | 0.945732  | 0.000000 |
| 6  | 0.130694  | -0.964533 | 0.000000 |
| 7  | -3.237562 | 0.641124  | 0.000000 |
| 8  | -0.915699 | -2.875691 | 0.000000 |
| 9  | 0.000000  | 0.430162  | 0.000000 |
| 10 | -1.488267 | 2.234171  | 0.000000 |
| 11 | 1.318834  | -1.412895 | 0.000000 |
| 12 | 2.598287  | 0.423359  | 0.000000 |
| 13 | -0.703297 | 2.803262  | 0.000000 |

**6a**

|    |           |           |          |
|----|-----------|-----------|----------|
| 1  | -2.313244 | 0.816715  | 0.000000 |
| 2  | -2.721579 | -0.457814 | 0.000000 |
| 3  | -0.973640 | 1.211202  | 0.000000 |
| 4  | -3.102974 | 1.563886  | 0.000000 |
| 5  | -1.799592 | -1.390375 | 0.000000 |
| 6  | 0.000000  | 0.215299  | 0.000000 |
| 7  | -0.695294 | 2.257310  | 0.000000 |
| 8  | -0.455365 | -1.089302 | 0.000000 |
| 9  | -2.201598 | -2.642746 | 0.000000 |
| 10 | 1.289348  | 0.396841  | 0.000000 |
| 11 | 0.244795  | -1.826182 | 0.000000 |
| 12 | 3.255981  | 1.250433  | 0.000000 |
| 13 | -1.510689 | -3.323667 | 0.000000 |

**6b**

|    |           |           |          |
|----|-----------|-----------|----------|
| 1  | -2.281415 | 0.991965  | 0.000000 |
| 2  | -2.757529 | -0.265451 | 0.000000 |
| 3  | -0.924609 | 1.311420  | 0.000000 |
| 4  | -3.030323 | 1.779512  | 0.000000 |
| 5  | -1.872949 | -1.232858 | 0.000000 |
| 6  | 0.000000  | 0.262553  | 0.000000 |
| 7  | -0.589573 | 2.340547  | 0.000000 |
| 8  | -0.522473 | -1.008699 | 0.000000 |
| 9  | -2.195565 | -2.506180 | 0.000000 |
| 10 | 1.294641  | 0.380149  | 0.000000 |
| 11 | 0.099031  | -1.813932 | 0.000000 |
| 12 | 3.366389  | 0.911786  | 0.000000 |
| 13 | -3.165672 | -2.613027 | 0.000000 |

**TS1\_4**

|    |           |           |           |
|----|-----------|-----------|-----------|
| 1  | -2.478439 | -0.338043 | -0.165234 |
| 2  | -1.536176 | -1.389714 | -0.107355 |
| 3  | -2.121922 | 0.967743  | -0.072702 |
| 4  | -3.491316 | -0.654817 | -0.389872 |
| 5  | -0.243785 | -1.13847  | 0.168645  |
| 6  | -0.713356 | 1.255015  | 0.115177  |
| 7  | -1.778163 | -2.294912 | -0.509185 |
| 8  | -2.830861 | 1.765436  | -0.265082 |
| 9  | 0.019145  | 0.136099  | 0.798773  |
| 10 | -0.003601 | 2.162854  | -0.262976 |
| 11 | -0.260962 | 0.110003  | 1.78908   |
| 12 | 2.315056  | 0.121514  | -0.119057 |
| 13 | 0.756652  | -1.795124 | -0.156903 |

**TS1\_2a**

|    |           |           |           |
|----|-----------|-----------|-----------|
| 1  | 2.042759  | 1.577514  | 0.000077  |
| 2  | 0.657668  | 1.505197  | -0.00006  |
| 3  | 2.819721  | 0.46092   | 0.000133  |
| 4  | 2.450909  | 2.581947  | 0.00014   |
| 5  | -0.022211 | 0.317158  | -0.00013  |
| 6  | 2.111427  | -0.777892 | 0.000024  |
| 7  | 0.118019  | 2.36323   | -0.000111 |
| 8  | 3.901262  | 0.504091  | 0.000251  |
| 9  | 0.720807  | -0.77894  | -0.000092 |
| 10 | 2.439727  | -1.990657 | 0.000008  |
| 11 | -1.311279 | 0.30946   | -0.000205 |
| 12 | 1.044198  | -2.015145 | -0.000114 |
| 13 | -3.395073 | -0.226728 | 0.000092  |

**TS2a\_2b**

|    |           |           |           |
|----|-----------|-----------|-----------|
| 1  | 2.290931  | -1.094016 | -0.051717 |
| 2  | 1.066126  | -1.687236 | 0.013603  |
| 3  | 2.386611  | 0.275037  | -0.061945 |
| 4  | 3.150015  | -1.755747 | -0.093454 |
| 5  | -0.087716 | -0.955068 | 0.057852  |
| 6  | 1.185864  | 1.013689  | 0.020024  |
| 7  | 0.974449  | -2.702397 | 0.010055  |
| 8  | 3.341483  | 0.781966  | -0.121959 |
| 9  | -0.016354 | 0.412257  | 0.073991  |
| 10 | -1.227814 | -1.503534 | 0.063706  |
| 11 | 1.218817  | 2.344335  | -0.062236 |
| 12 | -2.525368 | 0.380155  | -0.048747 |
| 13 | 1.110838  | 2.83367   | 0.770088  |

**TS4\_5a**

|    |           |           |           |
|----|-----------|-----------|-----------|
| 1  | 1.974507  | 1.619328  | -0.000046 |
| 2  | 2.728996  | 0.468042  | -0.000074 |
| 3  | 0.609875  | 1.572381  | 0.000064  |
| 4  | 2.530419  | 2.550176  | -0.000091 |
| 5  | 2.093268  | -0.725289 | -0.000062 |
| 6  | -0.057266 | 0.296198  | 0.000089  |
| 7  | 3.746078  | 0.495118  | -0.000455 |
| 8  | 0.031814  | 2.486901  | 0.000332  |
| 9  | 0.729659  | -0.791078 | -0.000064 |
| 10 | -1.342435 | 0.174405  | 0.000192  |
| 11 | 2.531121  | -1.902784 | 0.000076  |
| 12 | -3.445576 | -0.199461 | -0.000073 |
| 13 | 1.160833  | -2.0304   | 0.000226  |

**TS5a\_5b**

|    |           |           |           |
|----|-----------|-----------|-----------|
| 1  | -2.271538 | -1.140084 | -0.048671 |
| 2  | -2.295709 | 0.238065  | -0.046887 |
| 3  | -1.080673 | -1.794733 | 0.011812  |
| 4  | -3.234504 | -1.635928 | -0.103614 |
| 5  | -1.16011  | 0.96432   | 0.023041  |
| 6  | 0.116117  | -1.010241 | 0.054114  |
| 7  | -3.178964 | 0.740169  | -0.119566 |
| 8  | -1.018121 | -2.876141 | 0.008469  |
| 9  | 0.027286  | 0.387204  | 0.068423  |
| 10 | -1.287825 | 2.286268  | -0.068119 |
| 11 | 1.291792  | -1.482965 | 0.060356  |
| 12 | 2.547228  | 0.403962  | -0.044475 |
| 13 | -1.288537 | 2.773769  | 0.773771  |

## 2-thiouracil

---

| <b>1</b> |           |           |           | <b>2a</b> |           |           |          |
|----------|-----------|-----------|-----------|-----------|-----------|-----------|----------|
| 1        | -2.380114 | -1.418694 | -0.464023 | 1         | -2.661978 | -0.220876 | 0.000000 |
| 2        | -1.01523  | -1.504332 | -0.173921 | 2         | -1.643206 | -1.127928 | 0.000000 |
| 3        | -3.037787 | -0.243104 | -0.394989 | 3         | -2.372018 | 1.111692  | 0.000000 |
| 4        | -2.84859  | -2.355463 | -0.742798 | 4         | -3.670606 | -0.620679 | 0.000000 |
| 5        | -0.28919  | -0.447224 | 0.222536  | 5         | -0.326109 | -0.773488 | 0.000000 |
| 6        | -2.337879 | 0.9715    | 0.00142   | 6         | -1.001864 | 1.470258  | 0.000000 |
| 7        | -0.556087 | -2.408555 | -0.215739 | 7         | -1.858419 | -2.123490 | 0.000000 |
| 8        | -4.095829 | -0.171021 | -0.617062 | 8         | -3.138192 | 1.876832  | 0.000000 |
| 9        | -0.921366 | 0.724537  | 0.301908  | 9         | 0.000000  | 0.560367  | 0.000000 |
| 10       | -2.75359  | 2.093715  | 0.113231  | 10        | -0.749297 | 2.761364  | 0.000000 |
| 11       | -0.441431 | 1.530707  | 0.691885  | 11        | 2.520562  | 0.123899  | 0.000000 |
| 12       | 3.495569  | 0.508591  | -0.43775  | 12        | 0.188990  | 3.003635  | 0.000000 |
| 13       | 1.36783   | -0.702095 | 0.727955  | 13        | 0.858476  | -2.016111 | 0.000000 |

  

| <b>2b</b> |          |           |          | <b>3a</b> |           |           |          |
|-----------|----------|-----------|----------|-----------|-----------|-----------|----------|
| 1         | 2.650764 | -0.217923 | 0.000000 | 1         | 0.664009  | -1.767751 | 0.000000 |
| 2         | 1.666439 | -1.157041 | 0.000000 | 2         | -0.330617 | -0.839961 | 0.000000 |
| 3         | 2.332722 | 1.115209  | 0.000000 | 3         | 2.007155  | -1.455493 | 0.000000 |
| 4         | 3.672041 | -0.585259 | 0.000000 | 4         | 0.351582  | -2.807840 | 0.000000 |
| 5         | 0.335231 | -0.832620 | 0.000000 | 5         | 0.000000  | 0.475564  | 0.000000 |
| 6         | 0.954420 | 1.434797  | 0.000000 | 6         | 2.349652  | -0.096573 | 0.000000 |
| 7         | 1.912420 | -2.145589 | 0.000000 | 7         | 2.785289  | -2.208657 | 0.000000 |
| 8         | 3.105646 | 1.874643  | 0.000000 | 8         | 1.340138  | 0.820342  | 0.000000 |
| 9         | 0.000000 | 0.489310  | 0.000000 | 9         | 3.605512  | 0.257448  | 0.000000 |

|    |           |           |          |    |           |           |          |
|----|-----------|-----------|----------|----|-----------|-----------|----------|
| 10 | 0.468487  | 2.664429  | 0.000000 | 10 | 1.547088  | 1.818777  | 0.000000 |
| 11 | 1.149530  | 3.359738  | 0.000000 | 11 | -2.784818 | -0.518939 | 0.000000 |
| 12 | -2.451571 | 0.230014  | 0.000000 | 12 | 3.807216  | 1.210203  | 0.000000 |
| 13 | -0.866250 | -2.046369 | 0.000000 | 13 | -1.176903 | 1.719349  | 0.000000 |

**3b**

|    |           |           |           |
|----|-----------|-----------|-----------|
| 1  | 0.747241  | 1.734247  | 0.000135  |
| 2  | -0.287645 | 0.859740  | 0.000170  |
| 3  | 2.080412  | 1.361140  | 0.000298  |
| 4  | 0.486898  | 2.788908  | 0.000684  |
| 5  | -0.017479 | -0.476645 | 0.000000  |
| 6  | 2.349757  | -0.012091 | -0.000125 |
| 7  | 2.875972  | 2.096567  | 0.000757  |
| 8  | 1.297297  | -0.875522 | -0.000384 |
| 9  | 3.510505  | -0.611596 | -0.000267 |
| 10 | 4.278818  | -0.013109 | 0.000150  |
| 11 | -2.759124 | 0.644821  | -0.000257 |
| 12 | 1.502503  | -1.876037 | -0.000681 |
| 13 | -1.254556 | -1.658089 | 0.000376  |

**4**

|    |           |           |          |
|----|-----------|-----------|----------|
| 1  | -2.383728 | 0.470387  | 0.000000 |
| 2  | -2.305315 | -0.873599 | 0.000000 |
| 3  | -1.254645 | 1.260093  | 0.000000 |
| 4  | -3.383778 | 0.892315  | 0.000000 |
| 5  | -1.111709 | -1.601722 | 0.000000 |
| 6  | 0.000000  | 0.611408  | 0.000000 |
| 7  | -3.152476 | -1.436808 | 0.000000 |
| 8  | -1.325500 | 2.338260  | 0.000000 |
| 9  | 0.009037  | -0.746963 | 0.000000 |
| 10 | 1.141167  | 1.227139  | 0.000000 |
| 11 | 0.900079  | -1.234372 | 0.000000 |
| 12 | 2.927761  | 2.407678  | 0.000000 |
| 13 | -1.009278 | -3.226695 | 0.000000 |

**5a**

|    |           |           |          |
|----|-----------|-----------|----------|
| 1  | 0.184023  | -2.567330 | 0.000000 |
| 2  | 1.291611  | -1.753493 | 0.000000 |
| 3  | -1.058871 | -2.018545 | 0.000000 |
| 4  | 0.376999  | -3.634695 | 0.000000 |
| 5  | 1.194945  | -0.397627 | 0.000000 |
| 6  | -1.155937 | -0.592956 | 0.000000 |
| 7  | 2.211693  | -2.187834 | 0.000000 |
| 8  | -1.958376 | -2.621447 | 0.000000 |
| 9  | 0.000000  | 0.194837  | 0.000000 |
| 10 | -2.259946 | 0.035565  | 0.000000 |
| 11 | -1.621609 | 2.182486  | 0.000000 |
| 12 | 2.728953  | 0.449749  | 0.000000 |
| 13 | 2.191952  | 1.683094  | 0.000000 |

**5b**

|    |           |           |          |
|----|-----------|-----------|----------|
| 1  | -0.020465 | -2.588947 | 0.000000 |
| 2  | 1.152176  | -1.861636 | 0.000000 |
| 3  | -1.220080 | -1.952357 | 0.000000 |
| 4  | 0.092548  | -3.667721 | 0.000000 |
| 5  | 1.150930  | -0.505289 | 0.000000 |
| 6  | -1.213306 | -0.520761 | 0.000000 |
| 7  | 2.030983  | -2.370397 | 0.000000 |
| 8  | -2.159570 | -2.491089 | 0.000000 |
| 9  | 0.000000  | 0.165686  | 0.000000 |
| 10 | -2.257836 | 0.199733  | 0.000000 |
| 11 | -1.376255 | 2.281044  | 0.000000 |
| 12 | 2.616879  | 0.447143  | 0.000000 |
| 13 | 3.506053  | -0.568066 | 0.000000 |

**6a**

|    |           |           |          |
|----|-----------|-----------|----------|
| 1  | -2.368187 | 0.271843  | 0.000000 |
| 2  | -2.250554 | -1.061985 | 0.000000 |
| 3  | -1.281514 | 1.147425  | 0.000000 |
| 4  | -3.384772 | 0.656918  | 0.000000 |
| 5  | -1.039379 | -1.582578 | 0.000000 |
| 6  | 0.000000  | 0.596486  | 0.000000 |
| 7  | -1.421641 | 2.220941  | 0.000000 |
| 8  | 0.080619  | -0.777665 | 0.000000 |
| 9  | 1.119370  | 1.263668  | 0.000000 |
| 10 | 1.008666  | -1.189419 | 0.000000 |

**6b**

|    |           |           |          |
|----|-----------|-----------|----------|
| 1  | -2.373614 | 0.312813  | 0.000000 |
| 2  | -2.280553 | -1.026285 | 0.000000 |
| 3  | -1.275057 | 1.170826  | 0.000000 |
| 4  | -3.383733 | 0.714441  | 0.000000 |
| 5  | -1.075534 | -1.560644 | 0.000000 |
| 6  | 0.000000  | 0.599736  | 0.000000 |
| 7  | -1.398542 | 2.246327  | 0.000000 |
| 8  | 0.055864  | -0.771820 | 0.000000 |
| 9  | 1.128067  | 1.249568  | 0.000000 |
| 10 | 0.974064  | -1.208600 | 0.000000 |

|    |           |           |          |    |           |           |          |
|----|-----------|-----------|----------|----|-----------|-----------|----------|
| 11 | 2.651625  | 2.754987  | 0.000000 | 11 | 2.706317  | 2.692706  | 0.000000 |
| 12 | -0.953691 | -3.324363 | 0.000000 | 12 | -0.829529 | -3.287325 | 0.000000 |
| 13 | 0.393369  | -3.429218 | 0.000000 | 13 | -2.152159 | -3.555268 | 0.000000 |

**TS1\_4**

|    |           |           |           |
|----|-----------|-----------|-----------|
| 1  | -2.446453 | -0.940705 | -0.273462 |
| 2  | -1.212064 | -1.600491 | -0.183296 |
| 3  | -2.559282 | 0.400376  | -0.132937 |
| 4  | -3.285846 | -1.583821 | -0.515086 |
| 5  | -0.070322 | -1.003796 | 0.181324  |
| 6  | -1.373579 | 1.183659  | 0.14462   |
| 7  | -1.163129 | -2.575431 | -0.476164 |
| 8  | -3.506532 | 0.908981  | -0.272956 |
| 9  | -0.186352 | 0.366503  | 0.563437  |
| 10 | -1.177954 | 2.373671  | 0.081715  |
| 11 | -0.079341 | 0.458879  | 1.581193  |
| 12 | 2.118473  | 1.078737  | -0.253897 |
| 13 | 1.473483  | -1.685751 | 0.12056   |

**TS1\_2a**

|    |           |           |           |
|----|-----------|-----------|-----------|
| 1  | 2.664348  | -1.177080 | -0.000018 |
| 2  | 1.326125  | -1.522220 | -0.000005 |
| 3  | 3.073544  | 0.123513  | -0.000017 |
| 4  | 3.354809  | -2.013556 | -0.000039 |
| 5  | 0.316809  | -0.602121 | 0.000013  |
| 6  | 2.028764  | 1.089902  | 0.000014  |
| 7  | 1.073551  | -2.506657 | -0.000011 |
| 8  | 4.118716  | 0.405857  | -0.000041 |
| 9  | 0.698674  | 0.665857  | 0.000028  |
| 10 | -1.311250 | -1.208444 | 0.000015  |
| 11 | 0.633000  | 1.931010  | 0.000096  |
| 12 | -3.330702 | 0.606998  | -0.000015 |
| 13 | 1.967447  | 2.345966  | -0.000007 |

**TS2a\_2b**

|    |           |           |           |
|----|-----------|-----------|-----------|
| 1  | 2.391431  | -1.163662 | -0.105724 |
| 2  | 1.133373  | -1.668741 | -0.021395 |
| 3  | 2.579526  | 0.19697   | -0.09048  |
| 4  | 3.201458  | -1.882737 | -0.17776  |
| 5  | 0.015423  | -0.881181 | 0.060728  |
| 6  | 1.428145  | 0.99709   | 0.043545  |
| 7  | 0.99466   | -2.678424 | -0.040707 |
| 8  | 3.562932  | 0.645598  | -0.155185 |
| 9  | 0.187586  | 0.476443  | 0.099699  |
| 10 | 1.550377  | 2.328472  | 0.018095  |
| 11 | 1.384003  | 2.783176  | 0.860419  |
| 12 | -2.231319 | 1.069792  | -0.098259 |
| 13 | -1.540847 | -1.590028 | 0.083569  |

**TS4\_5a**

|    |           |           |           |
|----|-----------|-----------|-----------|
| 1  | 1.41478   | 2.116847  | -0.000151 |
| 2  | 2.31162   | 1.079432  | 0.000371  |
| 3  | 0.070189  | 1.880314  | -0.000476 |
| 4  | 1.839867  | 3.114514  | -0.000384 |
| 5  | 1.881738  | -0.207724 | 0.000457  |
| 6  | -0.393287 | 0.520607  | 0.000069  |
| 7  | 3.310731  | 1.266398  | 0.000257  |
| 8  | -0.634974 | 2.700898  | -0.00102  |
| 9  | 0.531946  | -0.453336 | 0.000947  |
| 10 | 2.690336  | -1.684484 | -0.000422 |
| 11 | -3.653603 | -0.517021 | -0.000058 |
| 12 | 0.966472  | -1.719139 | 0.000313  |
| 13 | -1.650112 | 0.210818  | 0.000016  |

**TS5a\_5b**

|   |           |           |           |
|---|-----------|-----------|-----------|
| 1 | 1.561457  | 2.059599  | -0.040377 |
| 2 | 2.02563   | 0.762937  | -0.036963 |
| 3 | 0.222014  | 2.300019  | 0.007988  |
| 4 | 2.315216  | 2.838624  | -0.083038 |
| 5 | 1.191436  | -0.29857  | 0.016527  |
| 6 | -0.658349 | 1.172919  | 0.045769  |
| 7 | 3.028187  | 0.585752  | -0.064614 |
| 8 | -0.181946 | 3.305396  | 0.003933  |
| 9 | -0.118462 | -0.120267 | 0.048185  |

|    |           |           |           |
|----|-----------|-----------|-----------|
| 10 | -1.923881 | 1.234655  | 0.05605   |
| 11 | -2.477578 | -0.970208 | -0.039447 |
| 12 | 1.920302  | -1.934031 | -0.06486  |
| 13 | 1.806789  | -2.160852 | 1.264013  |

## 4-thiouracil

---

| <b>1</b> |           |           |          | <b>2a</b> |           |           |          |
|----------|-----------|-----------|----------|-----------|-----------|-----------|----------|
| 1        | -2.404124 | 0.596976  | 0.000000 | 1         | 0.528654  | -2.517606 | 0.000000 |
| 2        | -1.166684 | 1.260503  | 0.000000 | 2         | -0.752844 | -2.045158 | 0.000000 |
| 3        | -2.459823 | -0.750434 | 0.000000 | 3         | 1.572705  | -1.637243 | 0.000000 |
| 4        | -3.273957 | 1.241932  | 0.000000 | 4         | 0.651486  | -3.595322 | 0.000000 |
| 5        | 0.000000  | 0.590841  | 0.000000 | 5         | -1.022880 | -0.709421 | 0.000000 |
| 6        | -1.253064 | -1.551462 | 0.000000 | 6         | 1.281105  | -0.244294 | 0.000000 |
| 7        | -1.142031 | 2.272265  | 0.000000 | 7         | -1.548744 | -2.680463 | 0.000000 |
| 8        | -3.414273 | -1.261745 | 0.000000 | 8         | 2.594571  | -1.997338 | 0.000000 |
| 9        | -0.061399 | -0.747472 | 0.000000 | 9         | 0.000000  | 0.201955  | 0.000000 |
| 10       | -1.134208 | -3.179006 | 0.000000 | 10        | 2.644160  | 0.830942  | 0.000000 |
| 11       | 0.807213  | -1.274489 | 0.000000 | 11        | -1.853877 | 1.942438  | 0.000000 |
| 12       | 3.070558  | 2.162942  | 0.000000 | 12        | 1.941882  | 1.982070  | 0.000000 |
| 13       | 1.132232  | 1.215069  | 0.000000 | 13        | -2.219476 | -0.287373 | 0.000000 |

  

| <b>2b</b> |           |           |          | <b>3a</b> |           |           |          |
|-----------|-----------|-----------|----------|-----------|-----------|-----------|----------|
| 1         | 0.405201  | -2.552155 | 0.000000 | 1         | -1.228508 | -1.223310 | 0.000000 |
| 2         | -0.854606 | -2.028473 | 0.000000 | 2         | -1.207881 | 0.132779  | 0.000000 |
| 3         | 1.493643  | -1.721996 | 0.000000 | 3         | -0.084041 | -1.999442 | 0.000000 |
| 4         | 0.481547  | -3.634446 | 0.000000 | 4         | -2.207049 | -1.694222 | 0.000000 |
| 5         | -1.066196 | -0.678849 | 0.000000 | 5         | 0.000000  | 0.754834  | 0.000000 |
| 6         | 1.262423  | -0.320485 | 0.000000 | 6         | 1.166339  | -1.358254 | 0.000000 |
| 7         | -1.675539 | -2.631168 | 0.000000 | 7         | -0.148215 | -3.080871 | 0.000000 |
| 8         | 2.493304  | -2.137142 | 0.000000 | 8         | 1.158170  | 0.012807  | 0.000000 |
| 9         | 0.000000  | 0.173224  | 0.000000 | 9         | 2.620936  | -2.291116 | 0.000000 |
| 10        | 2.517098  | 0.879611  | 0.000000 | 10        | 2.021565  | 0.552607  | 0.000000 |
| 11        | 3.570220  | 0.037238  | 0.000000 | 11        | -2.213224 | 2.395238  | 0.000000 |
| 12        | -1.692093 | 2.022915  | 0.000000 | 12        | 3.495097  | -1.260633 | 0.000000 |
| 13        | -2.236178 | -0.192362 | 0.000000 | 13        | 0.049168  | 2.021767  | 0.000000 |

  

| <b>3b</b> |           |           |          | <b>4</b> |           |           |           |
|-----------|-----------|-----------|----------|----------|-----------|-----------|-----------|
| 1         | -1.238877 | -1.226092 | 0.000000 | 1        | -1.887113 | 1.749876  | 0.055614  |
| 2         | -1.213300 | 0.127799  | 0.000000 | 2        | -2.839937 | 0.829061  | -0.162774 |
| 3         | -0.097782 | -2.011186 | 0.000000 | 3        | -0.565993 | 1.389252  | 0.253421  |
| 4         | -2.219537 | -1.693156 | 0.000000 | 4        | -2.21098  | 2.786097  | 0.077873  |
| 5         | 0.000000  | 0.745071  | 0.000000 | 5        | -2.601023 | -0.558038 | -0.201648 |



|    |           |           |          |    |           |           |           |
|----|-----------|-----------|----------|----|-----------|-----------|-----------|
| 6  | 1.154003  | -1.375890 | 0.000000 | 6  | -0.237192 | 0.022164  | 0.239739  |
| 7  | -0.176559 | -3.090814 | 0.000000 | 7  | -3.812233 | 1.099531  | -0.300534 |
| 8  | 1.149974  | -0.002701 | 0.000000 | 8  | 0.172852  | 2.14545   | 0.473922  |
| 9  | 2.709347  | -2.132646 | 0.000000 | 9  | -1.23536  | -0.865817 | 0.012705  |
| 10 | 2.242162  | -3.398079 | 0.000000 | 10 | 1.319217  | -0.678262 | 0.6164    |
| 11 | 2.022133  | 0.526079  | 0.000000 | 11 | -1.036258 | -1.864927 | 0.012519  |
| 12 | -2.204773 | 2.401023  | 0.000000 | 12 | 3.679654  | 0.121778  | -0.399508 |
| 13 | 0.052116  | 2.011343  | 0.000000 | 13 | -3.442365 | -1.388969 | -0.396038 |

**5a**

|    |           |           |          |
|----|-----------|-----------|----------|
| 1  | -2.659655 | -0.282625 | 0.000000 |
| 2  | -2.299251 | 1.040750  | 0.000000 |
| 3  | -1.686027 | -1.234198 | 0.000000 |
| 4  | -3.722978 | -0.495432 | 0.000000 |
| 5  | -1.000967 | 1.410542  | 0.000000 |
| 6  | -0.317206 | -0.830632 | 0.000000 |
| 7  | -3.003813 | 1.776867  | 0.000000 |
| 8  | -1.938933 | -2.287088 | 0.000000 |
| 9  | 0.000000  | 0.533693  | 0.000000 |
| 10 | 0.919744  | -2.011842 | 0.000000 |
| 11 | 2.536243  | 0.151055  | 0.000000 |
| 12 | -0.846207 | 2.718750  | 0.000000 |
| 13 | 0.072490  | 3.024401  | 0.000000 |

**5b**

|    |           |           |          |
|----|-----------|-----------|----------|
| 1  | 2.653861  | -0.272729 | 0.000000 |
| 2  | 2.263967  | 1.055803  | 0.000000 |
| 3  | 1.713483  | -1.253344 | 0.000000 |
| 4  | 3.722844  | -0.454061 | 0.000000 |
| 5  | 0.952566  | 1.383260  | 0.000000 |
| 6  | 0.329599  | -0.886244 | 0.000000 |
| 7  | 2.981847  | 1.775959  | 0.000000 |
| 8  | 2.001873  | -2.297393 | 0.000000 |
| 9  | 0.000000  | 0.465149  | 0.000000 |
| 10 | -0.920631 | -2.042896 | 0.000000 |
| 11 | -2.465070 | 0.237628  | 0.000000 |
| 12 | 0.542862  | 2.639506  | 0.000000 |
| 13 | 1.237207  | 3.320910  | 0.000000 |

**6a**

|    |           |           |           |
|----|-----------|-----------|-----------|
| 1  | -1.779018 | 1.805079  | 0.06097   |
| 2  | -2.826675 | 0.996801  | -0.083711 |
| 3  | -0.452543 | 1.358284  | 0.184209  |
| 4  | -2.001761 | 2.869307  | 0.08767   |
| 5  | -2.593578 | -0.301614 | -0.109386 |
| 6  | -0.215675 | -0.006457 | 0.141779  |
| 7  | 0.349486  | 2.068704  | 0.333686  |
| 8  | -1.326112 | -0.813124 | -0.012677 |
| 9  | 1.286728  | -0.88511  | 0.328446  |
| 10 | -1.171437 | -1.819529 | -0.041461 |
| 11 | 3.702702  | 0.171283  | -0.22438  |
| 12 | -3.630791 | -1.093816 | -0.238238 |
| 13 | -3.457253 | -2.049352 | -0.232231 |

**6b**

|    |           |           |           |
|----|-----------|-----------|-----------|
| 1  | -1.839403 | 1.783909  | 0.068349  |
| 2  | -2.848781 | 0.932763  | -0.141099 |
| 3  | -0.508350 | 1.383495  | 0.255106  |
| 4  | -2.104703 | 2.837913  | 0.097185  |
| 5  | -2.549788 | -0.351350 | -0.162812 |
| 6  | -0.216831 | 0.023880  | 0.219878  |
| 7  | 0.258540  | 2.117948  | 0.461641  |
| 8  | -1.279484 | -0.818273 | 0.001882  |
| 9  | 1.306249  | -0.781124 | 0.528617  |
| 10 | -1.132057 | -1.827194 | -0.018086 |
| 11 | 3.678145  | 0.137036  | -0.353526 |
| 12 | -3.445519 | -1.288691 | -0.348217 |
| 13 | -4.336417 | -0.902914 | -0.450961 |

**TS1\_4**

|   |           |           |           |
|---|-----------|-----------|-----------|
| 1 | -2.510205 | 0.707066  | -0.209260 |
| 2 | -2.330348 | -0.657856 | -0.115902 |
| 3 | -1.471281 | 1.602403  | -0.098939 |
| 4 | -3.515666 | 1.024348  | -0.467746 |
| 5 | -1.099199 | -1.201618 | 0.140594  |
| 6 | -0.175868 | 1.114790  | 0.186748  |

**TS1\_2a**

|   |           |           |           |
|---|-----------|-----------|-----------|
| 1 | -1.483571 | 2.109285  | -0.000203 |
| 2 | -0.126602 | 1.833315  | -0.000530 |
| 3 | -2.403307 | 1.105774  | 0.000383  |
| 4 | -1.746623 | 3.160917  | -0.000591 |
| 5 | 0.355587  | 0.553334  | 0.000188  |
| 6 | -1.909740 | -0.231010 | 0.000400  |

|    |           |           |           |    |           |           |           |
|----|-----------|-----------|-----------|----|-----------|-----------|-----------|
| 7  | -3.071730 | -1.291379 | -0.412735 | 7  | 0.539464  | 2.597588  | -0.000704 |
| 8  | -1.631877 | 2.649790  | -0.328321 | 8  | -3.465116 | 1.316538  | 0.000481  |
| 9  | -0.129446 | -0.264364 | 0.678236  | 9  | -0.530564 | -0.432897 | 0.000978  |
| 10 | -0.192398 | -0.262890 | 1.705101  | 10 | -0.867979 | -1.697780 | -0.000095 |
| 11 | 2.093609  | -0.985083 | -0.165700 | 11 | 3.577248  | -0.556558 | -0.000095 |
| 12 | -0.722685 | -2.336426 | -0.077595 | 12 | 1.631666  | 0.350185  | 0.000172  |
| 13 | 1.317428  | 1.837056  | -0.038296 | 13 | -2.613230 | -1.754675 | -0.000395 |

**TS2a\_2b**

|    |           |           |           |
|----|-----------|-----------|-----------|
| 1  | -1.575012 | 2.060334  | -0.036680 |
| 2  | -0.226576 | 2.214938  | 0.013324  |
| 3  | -2.121069 | 0.793383  | -0.047755 |
| 4  | -2.168675 | 2.968843  | -0.064923 |
| 5  | 0.621101  | 1.139215  | 0.042490  |
| 6  | -1.239815 | -0.304612 | 0.010367  |
| 7  | 0.194813  | 3.143856  | 0.013445  |
| 8  | -3.193533 | 0.650896  | -0.088920 |
| 9  | 0.091119  | -0.123496 | 0.046955  |
| 10 | -1.853843 | -1.992327 | -0.063153 |
| 11 | 2.421225  | -0.979849 | -0.037226 |
| 12 | 1.878009  | 1.265507  | 0.048557  |
| 13 | -1.782718 | -2.183452 | 1.274407  |

**TS4\_5a**

|    |           |           |           |
|----|-----------|-----------|-----------|
| 1  | -2.661027 | -1.214977 | -0.002012 |
| 2  | -2.995293 | 0.121517  | -0.001585 |
| 3  | -1.354169 | -1.617178 | -0.000775 |
| 4  | -3.490795 | -1.912994 | -0.003274 |
| 5  | -2.005900 | 1.037968  | 0.000182  |
| 6  | -0.306045 | -0.636287 | 0.000780  |
| 7  | -3.965686 | 0.429355  | -0.002369 |
| 8  | -1.110195 | -2.671673 | -0.001043 |
| 9  | -0.692259 | 0.648100  | 0.001166  |
| 10 | 3.390858  | 0.593387  | -0.001626 |
| 11 | -0.690902 | 1.949944  | 0.002753  |
| 12 | -2.024034 | 2.295355  | 0.001470  |
| 13 | 1.338024  | -1.176855 | 0.002411  |

**TS5a\_5b**

|    |           |           |           |
|----|-----------|-----------|-----------|
| 1  | -2.376057 | -1.211749 | -0.101048 |
| 2  | -2.491425 | 0.158823  | -0.062027 |
| 3  | -1.138015 | -1.776459 | -0.030497 |
| 4  | -3.299255 | -1.774003 | -0.188505 |
| 5  | -1.403747 | 0.947284  | 0.046467  |
| 6  | 0.010728  | -0.929869 | 0.054701  |
| 7  | -3.403637 | 0.609231  | -0.120217 |
| 8  | -1.018030 | -2.852796 | -0.058304 |
| 9  | -0.176453 | 0.455503  | 0.088616  |
| 10 | 1.593858  | -1.564522 | 0.081827  |
| 11 | 2.245091  | 1.087644  | -0.090755 |
| 12 | -1.628795 | 2.261553  | 0.002376  |
| 13 | -1.534566 | 2.729084  | 0.850021  |

## 2,4-dithiouracil

**1**

|   |           |          |           |
|---|-----------|----------|-----------|
| 1 | -1.821080 | 1.979802 | -0.470213 |
|---|-----------|----------|-----------|

**2a**

|   |           |           |          |
|---|-----------|-----------|----------|
| 1 | -2.446760 | -1.053198 | 0.000000 |
|---|-----------|-----------|----------|

|    |           |           |           |    |           |           |          |
|----|-----------|-----------|-----------|----|-----------|-----------|----------|
| 2  | -0.460498 | 1.851383  | -0.162987 | 2  | -1.271469 | -1.739369 | 0.000000 |
| 3  | -2.637553 | 0.904689  | -0.417243 | 3  | -2.424957 | 0.313065  | 0.000000 |
| 4  | -2.142913 | 2.977356  | -0.743465 | 4  | -3.357774 | -1.642573 | 0.000000 |
| 5  | 0.074906  | 0.688348  | 0.233976  | 5  | -0.052381 | -1.123729 | 0.000000 |
| 6  | -2.138835 | -0.400604 | -0.033790 | 6  | -1.158717 | 0.955959  | 0.000000 |
| 7  | 0.137460  | 2.670848  | -0.186690 | 7  | -1.281671 | -2.757885 | 0.000000 |
| 8  | -3.689655 | 1.000591  | -0.656328 | 8  | -3.347807 | 0.880982  | 0.000000 |
| 9  | -0.737061 | -0.370486 | 0.299148  | 9  | 0.000000  | 0.245373  | 0.000000 |
| 10 | -2.963821 | -1.804458 | 0.059301  | 10 | -1.193500 | 2.695918  | 0.000000 |
| 11 | -0.378935 | -1.241076 | 0.681770  | 11 | 2.528421  | 0.349203  | 0.000000 |
| 12 | 3.657431  | -0.820551 | -0.459970 | 12 | 0.140894  | 2.891878  | 0.000000 |
| 13 | 1.741553  | 0.654684  | 0.770361  | 13 | 1.360694  | -2.099110 | 0.000000 |

**2b**

|    |           |           |          |
|----|-----------|-----------|----------|
| 1  | -2.555557 | -0.806925 | 0.000000 |
| 2  | -1.464827 | -1.618576 | 0.000000 |
| 3  | -2.394297 | 0.553959  | 0.000000 |
| 4  | -3.525206 | -1.294439 | 0.000000 |
| 5  | -0.183268 | -1.136788 | 0.000000 |
| 6  | -1.068222 | 1.051529  | 0.000000 |
| 7  | -1.587406 | -2.629723 | 0.000000 |
| 8  | -3.257274 | 1.207522  | 0.000000 |
| 9  | 0.000000  | 0.214982  | 0.000000 |
| 10 | -0.651385 | 2.740964  | 0.000000 |
| 11 | -1.900194 | 3.250055  | 0.000000 |
| 12 | 2.498027  | 0.155529  | 0.000000 |
| 13 | 1.137097  | -2.227807 | 0.000000 |

**3a**

|    |           |           |          |
|----|-----------|-----------|----------|
| 1  | -0.994144 | -1.544137 | 0.000000 |
| 2  | -1.125410 | -0.191968 | 0.000000 |
| 3  | 0.222678  | -2.196283 | 0.000000 |
| 4  | -1.915771 | -2.118683 | 0.000000 |
| 5  | 0.000000  | 0.568323  | 0.000000 |
| 6  | 1.393804  | -1.418419 | 0.000000 |
| 7  | 0.275446  | -3.278384 | 0.000000 |
| 8  | 1.225882  | -0.060481 | 0.000000 |
| 9  | 2.943602  | -2.181403 | 0.000000 |
| 10 | 2.036601  | 0.555526  | 0.000000 |
| 11 | -2.736515 | 1.679074  | 0.000000 |
| 12 | 3.697081  | -1.058903 | 0.000000 |
| 13 | -0.056126 | 2.283228  | 0.000000 |

**3b**

|    |           |           |          |
|----|-----------|-----------|----------|
| 1  | -1.003696 | -1.547847 | 0.000000 |
| 2  | -1.130685 | -0.197237 | 0.000000 |
| 3  | 0.211183  | -2.208429 | 0.000000 |
| 4  | -1.927433 | -2.119416 | 0.000000 |
| 5  | 0.000000  | 0.559544  | 0.000000 |
| 6  | 1.383416  | -1.435316 | 0.000000 |
| 7  | 0.249878  | -3.290345 | 0.000000 |
| 8  | 1.218831  | -0.074996 | 0.000000 |
| 9  | 3.015095  | -2.010004 | 0.000000 |
| 10 | 2.694668  | -3.320692 | 0.000000 |
| 11 | 2.038635  | 0.531736  | 0.000000 |
| 12 | -2.732685 | 1.684375  | 0.000000 |
| 13 | -0.050375 | 2.273075  | 0.000000 |

**4**

|    |           |           |           |
|----|-----------|-----------|-----------|
| 1  | -1.334950 | 2.069961  | -0.009568 |
| 2  | -2.370809 | 1.229555  | -0.143047 |
| 3  | -0.048344 | 1.600871  | 0.196493  |
| 4  | -1.563456 | 3.130133  | -0.061758 |
| 5  | -2.280263 | -0.170277 | -0.088787 |
| 6  | 0.135305  | 0.209752  | 0.285080  |
| 7  | -3.310738 | 1.591991  | -0.289859 |
| 8  | 0.765882  | 2.292896  | 0.351443  |
| 9  | -0.951646 | -0.584755 | 0.142487  |
| 10 | 1.620673  | -0.616961 | 0.697829  |
| 11 | -0.840562 | -1.593982 | 0.218694  |
| 12 | 3.998142  | -0.164263 | -0.467746 |
| 13 | -3.532378 | -1.189990 | -0.270266 |

**5a****5b**

|    |           |           |           |    |           |           |           |
|----|-----------|-----------|-----------|----|-----------|-----------|-----------|
| 1  | 1.486394  | 2.213434  | -0.000114 | 1  | -1.491751 | 2.233367  | 0.001377  |
| 2  | 2.128014  | 1.000858  | -0.000056 | 2  | -2.137259 | 1.015629  | 0.001738  |
| 3  | 0.126271  | 2.246440  | -0.000027 | 3  | -0.132511 | 2.274872  | -0.000775 |
| 4  | 2.118991  | 3.094462  | -0.000209 | 4  | -2.127591 | 3.112005  | 0.002561  |
| 5  | 1.445728  | -0.173806 | 0.000054  | 5  | -1.445145 | -0.148404 | 0.001078  |
| 6  | -0.592967 | 1.013713  | 0.000077  | 6  | 0.595276  | 1.043833  | -0.000955 |
| 7  | 3.145809  | 0.989494  | 0.000010  | 7  | -3.152970 | 1.008404  | -0.000460 |
| 8  | -0.408374 | 3.188324  | -0.000057 | 8  | 0.395052  | 3.220902  | -0.000863 |
| 9  | 0.109372  | -0.194607 | 0.000103  | 9  | -0.111267 | -0.154836 | 0.000631  |
| 10 | 2.470979  | -1.598190 | -0.000019 | 10 | 2.303014  | 1.024621  | -0.001548 |
| 11 | -2.304650 | 1.025653  | 0.000087  | 11 | 1.886524  | -1.670949 | 0.001851  |
| 12 | -1.971808 | -1.653205 | -0.000110 | 12 | -2.224906 | -1.716093 | -0.003805 |
| 13 | 1.464195  | -2.490038 | 0.001087  | 13 | -3.510232 | -1.306322 | 0.026470  |

**6a**

|    |           |           |           |
|----|-----------|-----------|-----------|
| 1  | -1.250139 | 2.060718  | 0.050507  |
| 2  | -2.348662 | 1.321290  | -0.086943 |
| 3  | 0.036426  | 1.521163  | 0.212637  |
| 4  | -1.396562 | 3.138258  | 0.039405  |
| 5  | -2.222676 | 0.000656  | -0.065256 |
| 6  | 0.168755  | 0.140081  | 0.218382  |
| 7  | 0.887835  | 2.171859  | 0.361901  |
| 8  | -0.990136 | -0.587897 | 0.071766  |
| 9  | 1.606153  | -0.827927 | 0.483833  |
| 10 | -0.908974 | -1.601932 | 0.085366  |
| 11 | 4.052229  | -0.066152 | -0.345243 |
| 12 | -3.699628 | -0.904371 | -0.223482 |
| 13 | -3.153891 | -2.137835 | -0.138820 |

**6b**

|    |           |           |           |
|----|-----------|-----------|-----------|
| 1  | 1.294327  | 2.071343  | 0.023696  |
| 2  | 2.374246  | 1.303036  | -0.129992 |
| 3  | -0.000093 | 1.568474  | 0.227119  |
| 4  | 1.466929  | 3.144559  | -0.008011 |
| 5  | 2.212105  | -0.012898 | -0.079099 |
| 6  | -0.164993 | 0.189970  | 0.267343  |
| 7  | -0.831797 | 2.241280  | 0.388730  |
| 8  | 0.969338  | -0.566048 | 0.106755  |
| 9  | -1.618866 | -0.725950 | 0.617622  |
| 10 | 0.874664  | -1.579555 | 0.152611  |
| 11 | -4.019360 | -0.121284 | -0.428565 |
| 12 | 3.554650  | -1.107330 | -0.245725 |
| 13 | 4.451694  | -0.108375 | -0.384087 |

**7**

|    |           |           |           |
|----|-----------|-----------|-----------|
| 1  | -0.440694 | 2.617950  | -0.230629 |
| 2  | -1.489817 | 1.714448  | -0.141741 |
| 3  | 0.866435  | 2.222007  | -0.111169 |
| 4  | -0.723720 | 3.629978  | -0.500739 |
| 5  | -1.306463 | 0.417809  | 0.200586  |
| 6  | 1.133175  | 0.861696  | 0.196469  |
| 7  | -2.410896 | 1.996669  | -0.475449 |
| 8  | 1.672126  | 2.911232  | -0.338976 |
| 9  | -0.006290 | 0.120820  | 0.717471  |
| 10 | -0.005930 | 0.099721  | 1.743529  |
| 11 | 2.508630  | -0.049448 | -0.046102 |
| 12 | -2.349936 | -0.862492 | -0.029040 |
| 13 | 0.394367  | -2.180510 | -0.179387 |

**TS1\_2a**

|    |           |           |           |
|----|-----------|-----------|-----------|
| 1  | -2.227780 | -1.837829 | 0.001228  |
| 2  | -0.855205 | -1.970478 | -0.000125 |
| 3  | -2.815807 | -0.606762 | 0.001224  |
| 4  | -2.786916 | -2.767053 | 0.002102  |
| 5  | -0.012404 | -0.895743 | -0.000815 |
| 6  | -1.952998 | 0.523234  | 0.000218  |
| 7  | -0.446853 | -2.901251 | 0.000594  |
| 8  | -3.893001 | -0.497739 | 0.002210  |
| 9  | -0.572313 | 0.305967  | -0.000858 |
| 10 | -2.173965 | 2.189536  | -0.000492 |
| 11 | 1.693862  | -1.238066 | -0.001201 |
| 12 | -0.522534 | 1.602729  | -0.001322 |
| 13 | 3.368876  | 0.894699  | 0.000963  |

**TS2a\_2b****TS4\_5b**

|    |           |           |           |    |           |           |           |
|----|-----------|-----------|-----------|----|-----------|-----------|-----------|
| 1  | -1.326520 | 2.334016  | -0.086246 | 1  | 2.222251  | -1.856620 | 0.000400  |
| 2  | 0.019853  | 2.211864  | -0.005519 | 2  | 2.742950  | -0.586944 | 0.000310  |
| 3  | -2.118608 | 1.202926  | -0.089830 | 3  | 0.870191  | -2.055640 | 0.000121  |
| 4  | -1.722694 | 3.343828  | -0.136565 | 4  | 2.940296  | -2.669394 | 0.000726  |
| 5  | 0.656823  | 0.996429  | 0.055441  | 5  | 1.929605  | 0.495151  | -0.000110 |
| 6  | -1.464583 | -0.037793 | 0.012303  | 6  | -0.000279 | -0.917092 | -0.000259 |
| 7  | 0.602830  | 3.048817  | -0.009779 | 7  | 3.750511  | -0.448208 | 0.000449  |
| 8  | -3.197822 | 1.275234  | -0.140987 | 8  | 0.461802  | -3.057892 | 0.000165  |
| 9  | -0.124332 | -0.126380 | 0.067942  | 9  | 0.567118  | 0.298796  | -0.000332 |
| 10 | -2.392569 | -1.574653 | -0.009846 | 10 | -1.713043 | -1.196455 | -0.000404 |
| 11 | 1.662531  | -1.813719 | -0.093601 | 11 | 2.226396  | 2.154423  | -0.000089 |
| 12 | -2.138916 | -1.862782 | 1.287512  | 12 | -3.462414 | 0.862181  | 0.000303  |
| 13 | 2.358485  | 0.880741  | 0.077651  | 13 | 0.580943  | 1.626633  | -0.000257 |

**TS1\_7**

|    |           |           |           |
|----|-----------|-----------|-----------|
| 1  | 1.758479  | 1.974696  | -0.505627 |
| 2  | 0.378437  | 2.066466  | -0.279346 |
| 3  | 2.411779  | 0.801169  | -0.334922 |
| 4  | 2.232980  | 2.887972  | -0.845225 |
| 5  | -0.339755 | 1.064283  | 0.236922  |
| 6  | 1.704703  | -0.378958 | 0.106465  |
| 7  | -0.107041 | 2.929831  | -0.512087 |
| 8  | 3.473150  | 0.725912  | -0.539785 |
| 9  | 0.339707  | -0.099006 | 0.485058  |
| 10 | 0.018412  | -0.654235 | 1.273940  |
| 11 | -2.357153 | -1.415114 | -0.459589 |
| 12 | 2.248038  | -1.919128 | 0.209452  |
| 13 | -2.042581 | 1.161218  | 0.500418  |

**TS7\_4**

|    |           |           |           |
|----|-----------|-----------|-----------|
| 1  | -1.619479 | 2.019915  | -0.520907 |
| 2  | -2.243525 | 0.833418  | -0.367027 |
| 3  | -0.266242 | 2.172726  | -0.266611 |
| 4  | -2.234731 | 2.839804  | -0.880104 |
| 5  | -1.634481 | -0.328224 | 0.096256  |
| 6  | 0.453831  | 1.075450  | 0.219316  |
| 7  | -3.236679 | 0.752167  | -0.579119 |
| 8  | 0.225915  | 3.120101  | -0.445151 |
| 9  | -0.253438 | -0.127762 | 0.411134  |
| 10 | -0.006988 | -0.635141 | 1.259945  |
| 11 | 2.241088  | -1.471146 | -0.496160 |
| 12 | 2.141159  | 1.068837  | 0.545378  |
| 13 | -2.371928 | -1.770887 | 0.272782  |
